# Supplementary material
Source: publisher figshare collection journal article supplement (https://adisjournals.figshare.com/ndownloader/files/30641922)

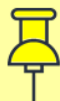

# There is a decreasing gastroenteritis incidence and mortality trend after 9 years of universal rotavirus vaccination in children in Peru.

## BACKGROUND

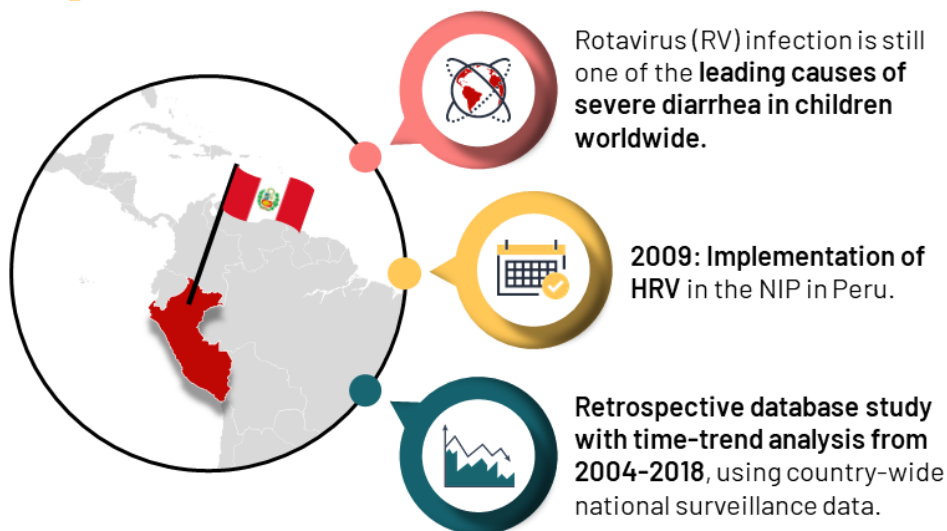

## RESULTS

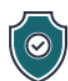

After 2009, national vaccination coverage ranged from 75-90% for the 2nd dose.

GE  
AMBULATORY  
CASES

40.3%

GE  
HOSPITALIZATIONS

46.2%

GE  
MORTALITY

55.5%

of decrease in the post-vaccination period in infants <1 year of age.

GE: gastroenteritis; HRV: Human-attenuated rotavirus vaccine; RV: rotavirus. This graphical abstract represents the opinions of the authors. For a full list of declarations, including funding and author disclosure statements, please see the full text online. © The authors, CC-BY-NC 2021.

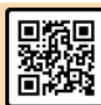

Supplement: Supplementary file 1 [file 30641922]
